CORRECTION

# Correction: Identification of an Extracellular Endoglucanase That Is Required for Full Virulence in *Xanthomonas citri* subsp. *citri*

Tian Xia, Yanjiao Li, Dongling Sun, Tao Zhuo, Xiaojing Fan, Huasong Zou

[S1 Fig](#) is incorrect. Please view the correct [S1 Fig](#) below.

There are errors in [S1](#) and [S2](#) Tables. The pET30a(+) vector of both tables should read pET41a(+).

## Supporting Information

**S1 Fig. Ectopic expression of cellulase in *E. coli*.** Bacteria were cultured in LB medium at 37°C to OD600 0.5. The recombinant proteins were induced for 3 h by supplementation with 0.5 mM IPTG. Cells were harvested, washed in PBS, and then resuspended in 10 mM PBS (pH7.5, 500 mM NaCl). After several freeze/thaw cycles, the cell suspension was sonicated for 3 min with an interval of 4 s between pulses, and then centrifuged at 5000 g for 10 min at 37°C. Twenty microliter supernatant samples were analysed by 12% SDS-PAGE. (TIF)

**S1 Table. Strains and plasmids used in this study.**  
(DOCX)

**S2 Table. Primers used in this study.**  
(DOCX)

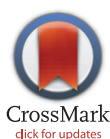

## Reference

1. Xia T, Li Y, Sun D, Zhuo T, Fan X, Zou H (2016) Identification of an Extracellular Endoglucanase That Is Required for Full Virulence in *Xanthomonas citrisubsp. citri*. PLoS ONE 11(3): e0151017. doi: [10.1371/journal.pone.0151017](https://doi.org/10.1371/journal.pone.0151017) PMID: [26950296](https://pubmed.ncbi.nlm.nih.gov/26950296/)

## OPEN ACCESS

**Citation:** Xia T, Li Y, Sun D, Zhuo T, Fan X, Zou H (2016) Correction: Identification of an Extracellular Endoglucanase That Is Required for Full Virulence in *Xanthomonas citri* subsp. *citri*. PLoS ONE 11(5): e0156458. doi:10.1371/journal.pone.0156458

**Published:** May 23, 2016

**Copyright:** © 2016 Xia et al. This is an open access article distributed under the terms of the [Creative Commons Attribution License](https://creativecommons.org/licenses/by/4.0/), which permits unrestricted use, distribution, and reproduction in any medium, provided the original author and source are credited.
